# Supplementary material
Source: PubMed Central journal article supplement (PMC3993412)

1 **SUPPLEMENTAL MATERIAL**

2

3 **Table S1.** Summary of proteins detected in the supernatant fraction of *B. thailandensis* wildtype–vir  
4 and *tssK-5*–vir cultures by mass spectrometry.

5

6 **Fig S1.** The *B. thailandensis clpV-5*–GFP mutant induces host cell fusions. Representative  
7 fluorescence microscopy images of RAW 264.7 macrophages infected with *B. thailandensis clpV-5*–  
8 GFP and wildtype and  $\Delta T6SS-5$  constitutively expressing GFP. The host cell plasma membrane was  
9 stained with Alexa Fluor 594–WGA conjugate and DNA was visualized with DAPI. Scale bar, 10  
10  $\mu\text{m}$ .

11

12 **Movie S1.** Representative time lapse fluorescence microscopy images of ClpV–5–GFP foci within  
13 *B. thailandensis* during infection of HeLa cells at 17 h post-infection (10 s intervals shown at seven  
14 frames per second).

15

16 **Movie S2.** Representative time lapse fluorescence microscopy images of ClpV–1–GFP foci within  
17 *B. thailandensis* grown in LB and transferred to agarose pads (10 s intervals shown at seven frames  
18 per second).

19

20

21

22

23

24

25

26 Table S1.

27

28

29

30

31

32

33

34

35

36

37

38

39

40

41

42

43

44

45

46

47

48

49

50

| Lous tag                           | Annotation <sup>a</sup>                                                 | Average spectral counts <sup>b</sup> |             |                     | Average no. of unique peptides <sup>c</sup> |             |                     |
|------------------------------------|-------------------------------------------------------------------------|--------------------------------------|-------------|---------------------|---------------------------------------------|-------------|---------------------|
|                                    |                                                                         | wt <sup>d</sup>                      | wt-vir      | $\Delta$ tssK-5-vir | wt <sup>d</sup>                             | wt-vir      | $\Delta$ tssK-5-vir |
| <b>BTH_I0868</b>                   | <b>Hcp protein</b>                                                      | <b>N/D</b>                           | <b>326</b>  | <b>43.5</b>         | <b>–</b>                                    | <b>12</b>   | <b>7</b>            |
| BTH_I0112                          | Lipoprotein, putative                                                   | 158.7                                | 181         | 178.5               | 14                                          | 13          | 13.5                |
| BTH_I1925                          | Chitin binding domain protein                                           | 403.2                                | 120.5       | 105                 | 21.2                                        | 14          | 12.5                |
| BTH_I2945                          | Peptidase, M1 family                                                    | 139                                  | 119         | 127                 | 22.7                                        | 21          | 20.5                |
| BTH_I3070                          | Translation elongation factor Tu                                        | 109.2                                | 105.5       | 119.5               | 17                                          | 13.5        | 16.5                |
| BTH_I1578                          | Microbial collagenase, putative                                         | 199.7                                | 86.5        | 92.5                | 24                                          | 13.5        | 13.5                |
| BTH_I2962                          | Unnamed protein product: Similar to Hcp protein                         | 418                                  | 80.5        | 78                  | 12.7                                        | 8           | 7.5                 |
| BTH_I3071                          | Translation elongation factor 2 (EF-2/EF-G)                             | 65.7                                 | 73.5        | 64.5                | 18.7                                        | 19          | 17.5                |
| BTH_I1421                          | Serine-type carboxypeptidase family protein                             | 84.2                                 | 68.5        | 63.5                | 15                                          | 12          | 12.5                |
| BTH_I3196                          | Flagellin                                                               | 29.2                                 | 66.5        | 64.5                | 6                                           | 6           | 5.5                 |
| BTH_I0816                          | ZmpA-like peptidase, Metallo peptidase                                  | N/C                                  | 61          | 68.5                | 0.7                                         | 13          | 15                  |
| <b>BTH_I0854</b>                   | <b>Ubiquitin-specific proteinase 31, putative</b>                       | <b>N/D</b>                           | <b>60.5</b> | <b>66.5</b>         | <b>–</b>                                    | <b>20</b>   | <b>21</b>           |
| BTH_I1544                          | Flagellar hook-associated protein 2                                     | 44.7                                 | 58.5        | 56                  | 8                                           | 13.5        | 13.5                |
| BTH_I3300                          | Amino acid/amide ABC transporter substrate-binding protein, HAAT family | 20                                   | 57          | 66.5                | 7                                           | 10.5        | 11                  |
| BTH_I0113                          | PqA                                                                     | 44                                   | 53          | 53.5                | 17                                          | 13          | 12                  |
| BTH_I1225                          | L-glutamate-binding protein / L-aspartate-binding protein               | N/C                                  | 52.5        | 34.5                | 6.2                                         | 13          | 9                   |
| BTH_I2402                          | Chitinase family 18                                                     | 333.2                                | 49.5        | 47                  | 9                                           | 5           | 6                   |
| BTH_I0658                          | Malate dehydrogenase                                                    | 33                                   | 48.5        | 53                  | 10                                          | 12.5        | 12.5                |
| BTH_I0783                          | Hypothetical protein                                                    | 186.2                                | 47          | 49.5                | 12.7                                        | 6.5         | 7.5                 |
| BTH_I1633                          | Hypothetical protein                                                    | 28.2                                 | 46.5        | 40.5                | 7.7                                         | 9.5         | 7.5                 |
| BTH_I0646                          | Succinyl-CoA synthase, beta subunit                                     | 30                                   | 46          | 49                  | 8.2                                         | 12.5        | 12                  |
| BTH_I1306                          | Carbohydrate ABC transporter substrate-binding protein, PAAT1 family    | 80                                   | 45.5        | 63.5                | 14.2                                        | 11          | 13                  |
| BTH_I0854                          | Aconitase                                                               | N/C                                  | 43.5        | 48                  | 6.2                                         | 12          | 13.5                |
| BTH_I1458                          | Chaperonin GroEL                                                        | 112                                  | 43          | 49.5                | 21.2                                        | 10          | 10.5                |
| BTH_I1834                          | LasA protease precursor                                                 | 205                                  | 39.5        | 58                  | 15                                          | 7.5         | 9.5                 |
| <b>BTH_I0863</b>                   | <b>Rhs element Vgr protein</b>                                          | <b>N/D</b>                           | <b>38</b>   | <b>N/D</b>          | <b>–</b>                                    | <b>13.5</b> | <b>–</b>            |
| BTH_I1598                          | Amino acid/amide ABC transporter substrate-binding protein, HAAT family | N/C                                  | 34.5        | 24.5                | 0.7                                         | 8.5         | 6.5                 |
| BTH_I0517                          | Hypothetical protein                                                    | 66.7                                 | 34          | 33.5                | 10.2                                        | 8           | 6.5                 |
| BTH_I1069                          | gp28                                                                    | 46                                   | 33          | 34                  | 14                                          | 5.5         | 6                   |
| BTH_I1282                          | Catalase/peroxidase HPI                                                 | N/C                                  | 32.5        | 41                  | 1.2                                         | 11          | 10.5                |
| BTH_I1783                          | Amino acid ABC transporter substrate-binding protein, PAAT family       | 22.7                                 | 31.5        | 34.5                | 6.7                                         | 8.5         | 8.5                 |
| BTH_I1872                          | Levansucrase                                                            | 60.2                                 | 31          | 35.5                | 14.7                                        | 9           | 8                   |
| BTH_I2276                          | Putrescine ABC transporter, periplasmic putrescine-binding protein      | N/C                                  | 30.5        | 26.5                | 3.2                                         | 10          | 8                   |
| BTH_I0955                          | Heat shock protein HtpG                                                 | 33.2                                 | 30.5        | 32.5                | 11.5                                        | 10.5        | 9                   |
| BTH_I0233                          | Lytic murein transglycosylase, putative                                 | 28.7                                 | 30          | 32                  | 10.2                                        | 10          | 9.5                 |
| <b>BTH_I3225/I0089<sup>f</sup></b> | <b>Rhs element Vgr protein, putative</b>                                | <b>62.7</b>                          | <b>28.5</b> | <b>29</b>           | <b>19.2</b>                                 | <b>9</b>    | <b>10</b>           |
| BTH_I1638                          | SSU ribosomal protein S1P                                               | 26.67                                | 28          | 24                  | 10.7                                        | 5.5         | 6                   |
| BTH_I0759                          | Isoctrate dehydrogenase (NADP)                                          | 18.2                                 | 27.5        | 27                  | 6                                           | 6.5         | 6                   |
| BTH_I02037                         | Aromatic amino acid aminotransferase apoenzyme (EC 2.6.1.57)            | 16.2                                 | 26.5        | 27                  | 6.7                                         | 9           | 8.5                 |
| <b>BTH_I3226/I0090<sup>e</sup></b> | <b>Hypothetical protein</b>                                             | <b>57.33</b>                         | <b>26.5</b> | <b>22</b>           | <b>11</b>                                   | <b>10</b>   | <b>4</b>            |
| BTH_I1654                          | Electron transfer flavoprotein, alpha subunit                           | 16.2                                 | 26          | 27.5                | 5                                           | 5.5         | 6                   |
| BTH_I1457                          | Chaperonin, 10 kDa                                                      | 20.7                                 | 26          | 30.5                | 5.7                                         | 5.5         | 4.5                 |
| BTH_I0675                          | Serine protease                                                         | N/C                                  | 24.5        | 25                  | 0.7                                         | 6.5         | 7                   |
| BTH_I0663                          | Phosphoglycerate kinase                                                 | N/C                                  | 24          | 25                  | 2.7                                         | 4.5         | 5.5                 |
| BTH_I2028                          | Translation elongation factor Ts (EF-Ts)                                | 18.2                                 | 24          | 20.5                | 6                                           | 6.5         | 5.5                 |
| BTH_I1851                          | Metallopeptidase domain protein                                         | 61                                   | 24          | 26                  | 11.2                                        | 6           | 6                   |
| BTH_I0564                          | Acyl-CoA dehydrogenase domain protein                                   | 15                                   | 23.5        | 18.5                | 5.7                                         | 7.5         | 6                   |
| BTH_I1852                          | Leucyl aminopeptidase (EC 3.4.11.10), Metallo peptidase.                | 37.2                                 | 22.5        | 23                  | 10.5                                        | 6           | 7                   |
| BTH_I0380                          | Serine peptidase                                                        | 88.2                                 | 20.5        | 28                  | 18.7                                        | 6           | 10                  |
| BTH_I0647                          | Succinyl-CoA synthetase (ADP-forming) alpha subunit                     | 15                                   | 19.5        | 24.5                | 4.7                                         | 5.5         | 5.5                 |
| BTH_I0967                          | Cytochrome c family protein                                             | 23                                   | 19.5        | 19                  | 5                                           | 3.5         | 3.5                 |
| BTH_I1515                          | Hypothetical protein                                                    | 157                                  | 19.5        | 23.5                | 24.2                                        | 7           | 8                   |
| BTH_I1308                          | Chaperone protein DnaK                                                  | 19                                   | 18          | 16                  | 7                                           | 6           | 4.5                 |
| BTH_I2231                          | Nucleoside diphosphate kinase                                           | 18                                   | 16.5        | 21.5                | 4                                           | 3           | 3.5                 |
| BTH_I2092                          | Antioxidant, AhpC/Tsa family                                            | 27.7                                 | 15.5        | 18                  | 6.2                                         | 5           | 5                   |
| BTH_I0720                          | Hypothetical protein                                                    | 25                                   | N/C         | N/C                 | 5.7                                         | 2.5         | 4                   |
| <b>BTH_I0068</b>                   | <b>Hypothetical protein</b>                                             | <b>32</b>                            | <b>N/C</b>  | <b>N/C</b>          | <b>6.7</b>                                  | <b>2</b>    | <b>3</b>            |
| BTH_I1243                          | Putative ABC transporter ATP-binding protein                            | 43.7                                 | N/C         | N/C                 | 11                                          | 2.5         | 2                   |
| <b>BTH_I2697</b>                   | <b>Rhs element Vgr protein, putative</b>                                | <b>45.2</b>                          | <b>N/C</b>  | <b>N/C</b>          | <b>13</b>                                   | <b>5</b>    | <b>4.5</b>          |
| BTH_I2044                          | Serine protease, subtilase family                                       | 53                                   | N/C         | N/C                 | 14                                          | 1.2         | 1                   |
| BTH_I1933                          | Hypothetical protein                                                    | 86.7                                 | N/C         | N/C                 | 3.2                                         | 0.7         | 0.7                 |
| <b>BTH_I2723</b>                   | <b>Filamentous haemagglutinin</b>                                       | <b>25.32</b>                         | <b>N/D</b>  | <b>N/D</b>          | <b>9.2</b>                                  | <b>–</b>    | <b>–</b>            |
| <b>BTH_I2691</b>                   | <b>Hypothetical protein</b>                                             | <b>27</b>                            | <b>N/D</b>  | <b>N/D</b>          | <b>9</b>                                    | <b>–</b>    | <b>–</b>            |
| BTH_I0261                          | Hypothetical protein                                                    | 30                                   | N/D         | N/D                 | 7.7                                         | –           | –                   |
| <b>BTH_I2705</b>                   | <b>Rhs element Vgr protein</b>                                          | <b>38</b>                            | <b>N/D</b>  | <b>N/D</b>          | <b>13</b>                                   | <b>–</b>    | <b>–</b>            |
| <b>BTH_I2693</b>                   | <b>Rhs element Vgr protein, putative</b>                                | <b>39</b>                            | <b>N/D</b>  | <b>N/C</b>          | <b>12</b>                                   | <b>–</b>    | <b>0.7</b>          |

<sup>a</sup> Burkholderia Genome Database (Burkholderia.com)<sup>b</sup> Average number of spectral counts detected across all technical replicates<sup>c</sup> Average number of unique peptide sequences obtained from biological replicates<sup>d</sup> Reference wild type secretome (Russell et al. 2012)<sup>e</sup> BTH\_I3226 and BTH\_I0090 encode proteins with 96% sequence identity. Unique peptides from the variable regions of the proteins were detected; however, using mass spectrometry it is not possible to define their relative contributions.<sup>f</sup> BTH\_I3225 and BTH\_I0089 encode 100% identical VgrG proteins. By mass spectrometry it is not possible to discriminate between the two proteins.

N/C, not considered.

N/D, not detected

T6SS-1 secreted proteins

T6SS-5 secreted proteins

Secretion is induced by VirAG but occurs independently of T6SS-5.

51

52 Figure S1.

53

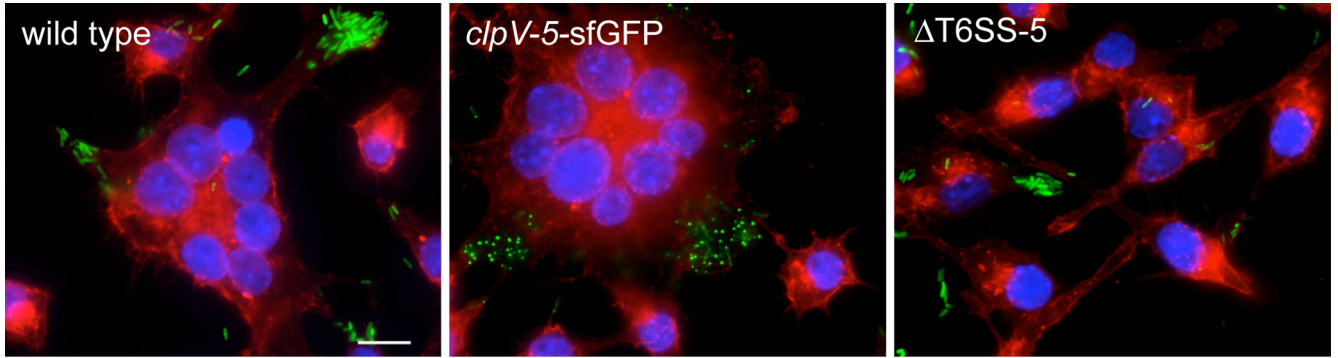

Supplement: IAI.01368-13_zii999090595so1.pdf [file IAI.01368-13_zii999090595so1.pdf]
